# Supplementary material
Source: PubMed Central journal article supplement (PMC10449561)
Supplement: NIHMS1923419-supplement-supplemental_material.pdf [file NIHMS1923419-supplement-supplemental_material.pdf]

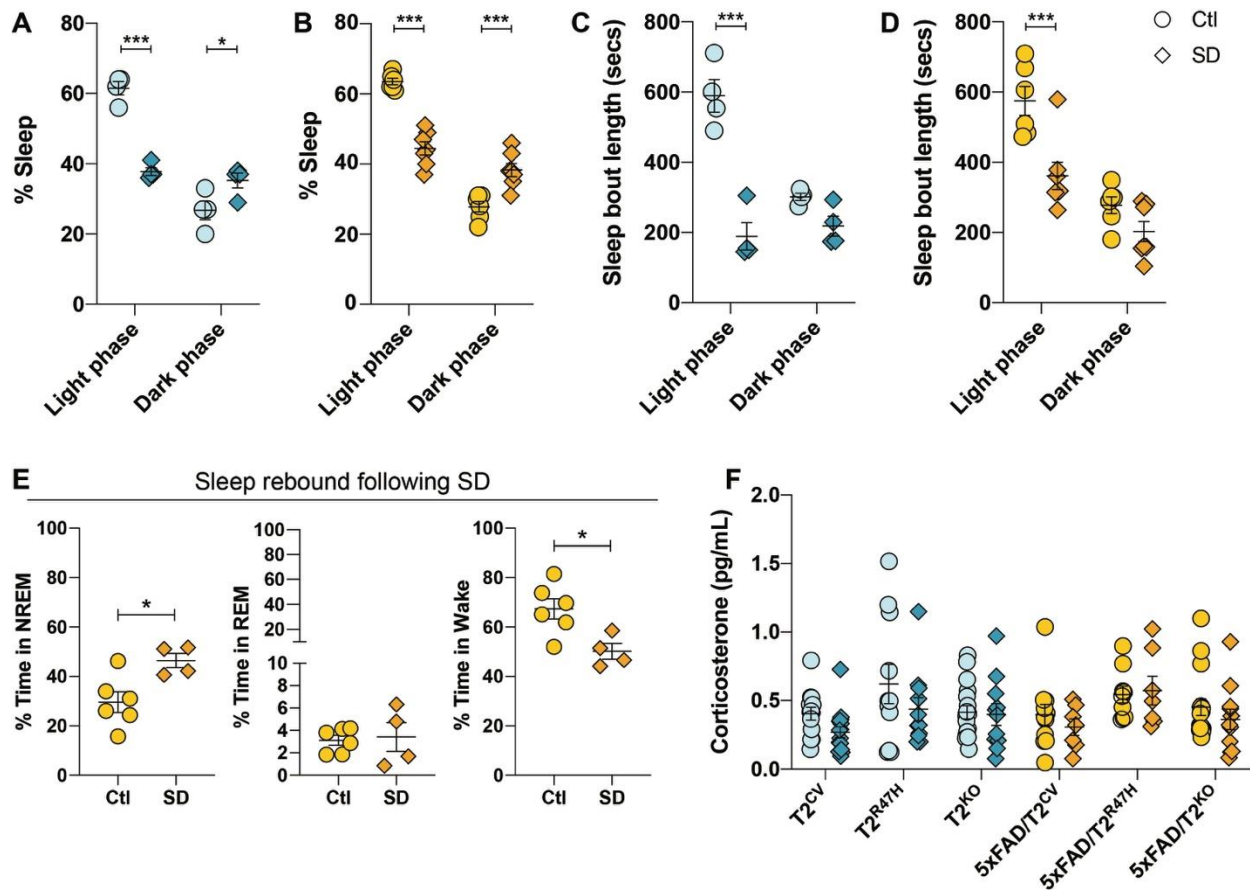

**Supplementary Figure 1. Sleep deprivation reduces time spent asleep and does not influence corticosterone levels.** Percentage sleep time at light and dark phase recorded from (A) T2<sup>CV</sup> (n=4 mice/group) (B) 5xFAD/T2<sup>CV</sup> mice (n=6-7 mice/group) during sleep deprivation or control mice. Sleep bout length at light and dark phase recorded from (C) T2<sup>CV</sup> (n=4 mice/group) (D) 5xFAD/T2<sup>CV</sup> mice (n=6-7 mice/group) during sleep deprivation or control mice. Data were recorded over a 24h period. (E) Electroencephalographical assessment of percentage time spent in non-rapid eye movement (NREM) sleep, REM sleep or time spent awake following sleep deprivation (SD) as a result of sleep rebound (n=4-6 mice/group). (F) Plasma corticosterone levels measured by ELISA.

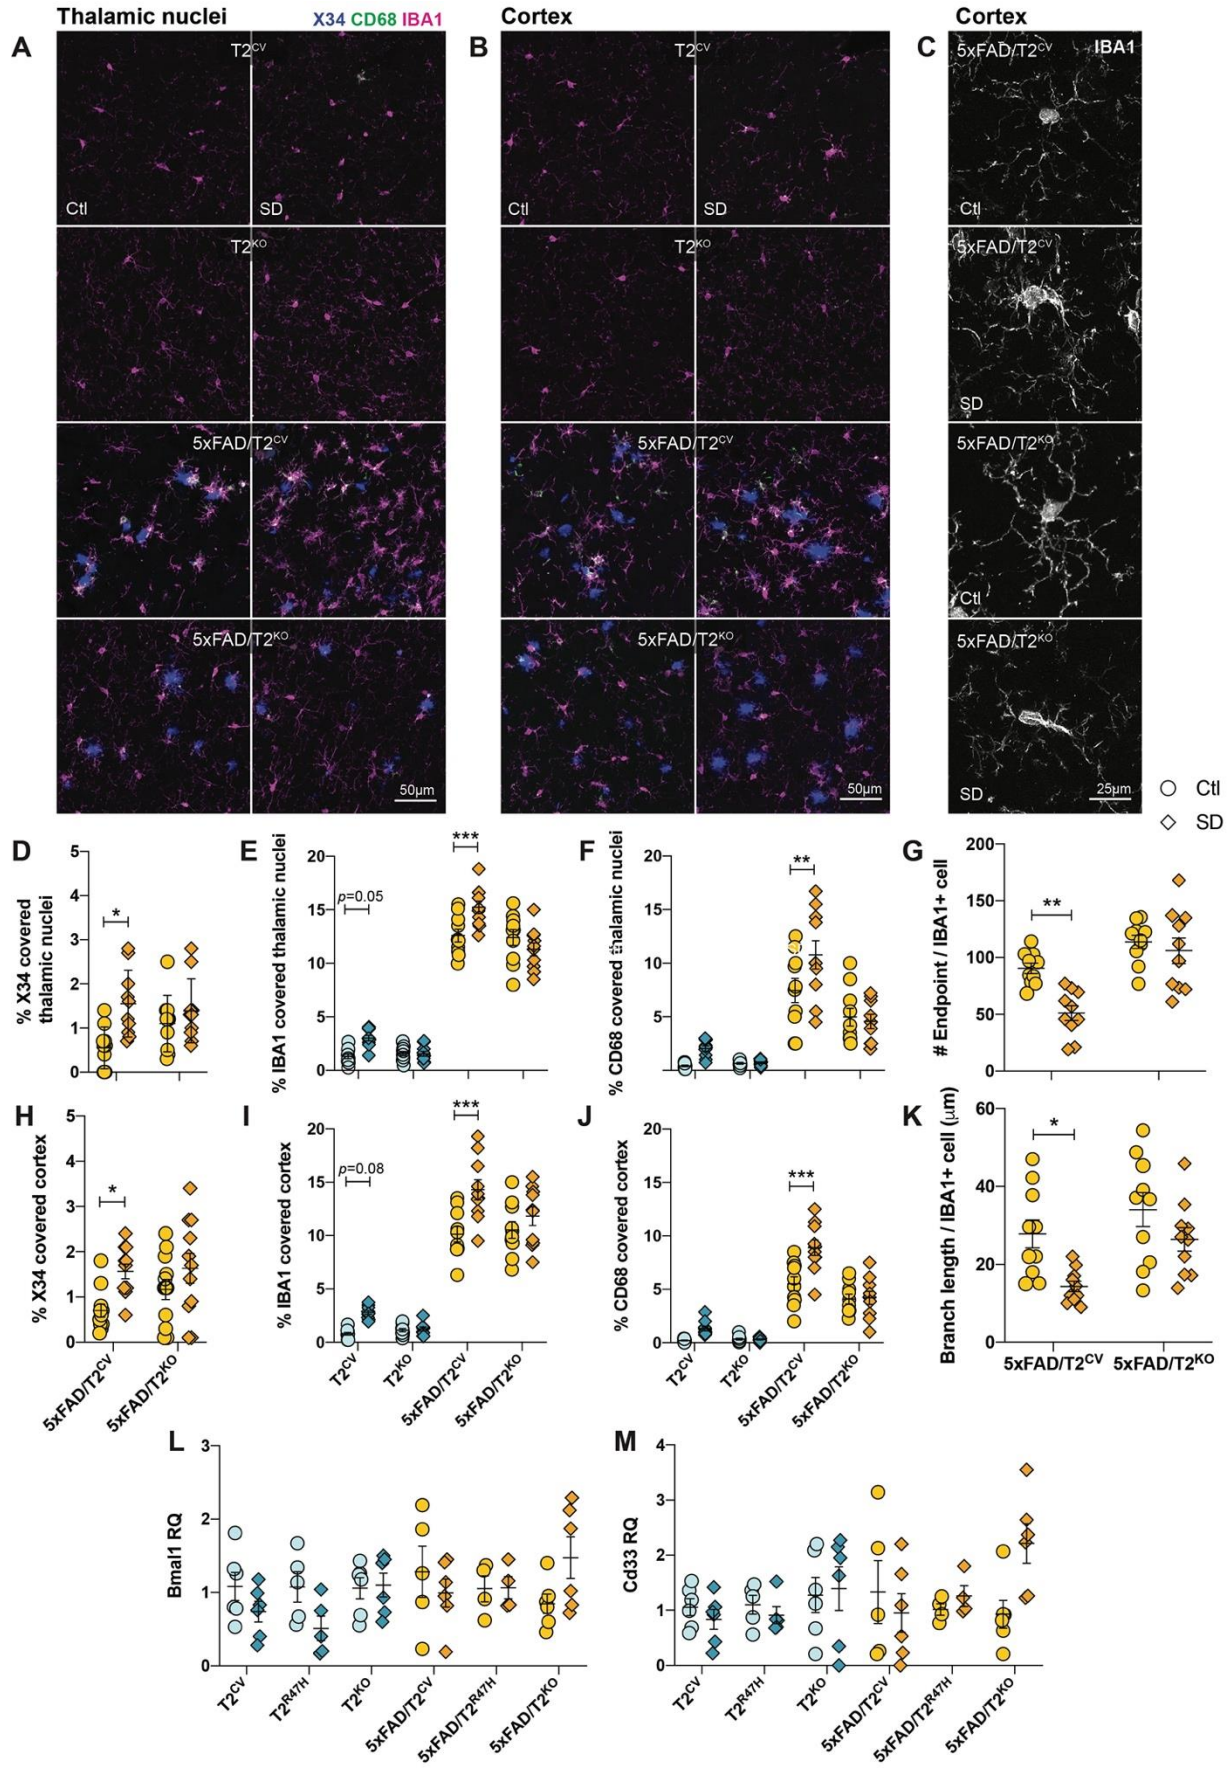

**Supplementary Figure 2. Sleep deprivation promotes amyloid deposition and microglial reactivity.** (A) Representative images of thalamic nuclei co-stained with X34 (blue), IBA1 (magenta) and CD68 (green). (B) Representative images of cortex co-stained X34, IBA1 and CD68. (C) Representative confocal images of IBA1+ microglia in cortex. Quantifications of (D) percentage X34, (E) percentage IBA1, and (F) percentage CD68 covered thalamic nuclei. (G) Quantification of number of endpoints per IBA1+ cell. Quantifications of (H) percentage X34, (I) percentage IBA1, and (J) percentage CD68 covered cortex. (K) Quantification of branch length per IBA1+ cell. n=8-12 mice/genotype. Quantitative PCR of (L) Bmal1 and (M) Cd33 normalized to geometric mean of two housekeeping genes. n=4-6 mice/genotype Ctl – Control, SD – Sleep deprived. Data represent mean  $\pm$  S.E.M. Two-way ANOVA, Sidak's multiple comparison test; \*P<0.05; \*\*P<0.01; \*\*\*P<0.001.



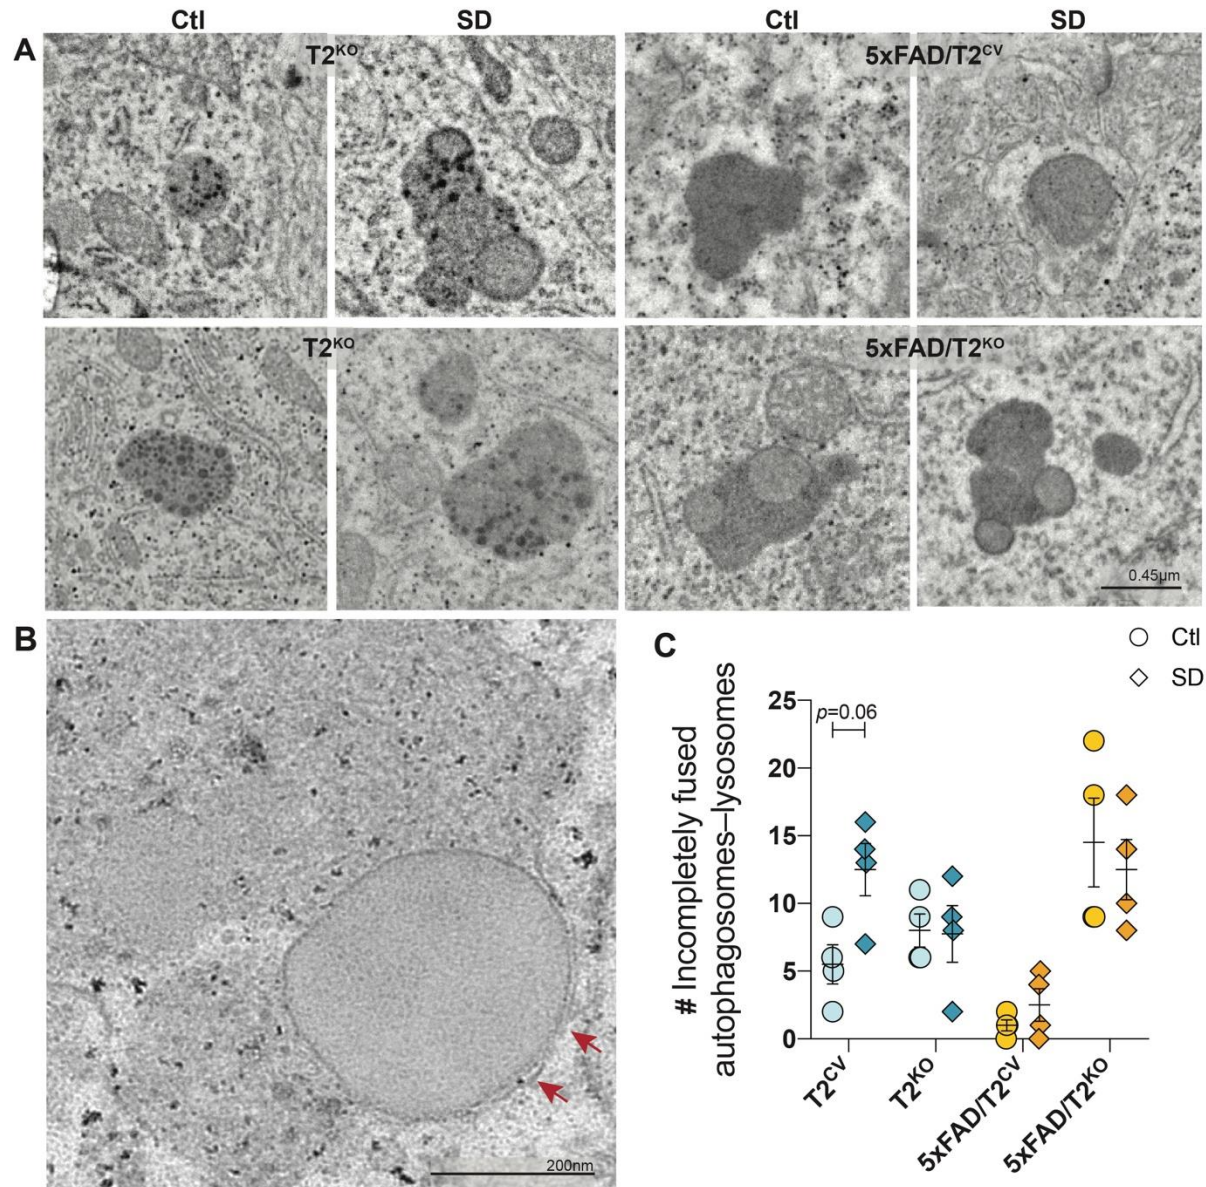

**Supplementary Figure 3. Sleep deprivation impairs autophagosome-lysosome fusion TREM2 dependently.** (A) Representative transmission electron microscopy images of autolysosomes from subiculum. (B) Higher magnification of an unfused autolysosome. Arrows point to the double membrane. (C) Number of incompletely fused autophago-lysosomes quantified in the subiculum. Data represent mean  $\pm$  S.E.M. Two-way ANOVA, Sidak's multiple comparison test.

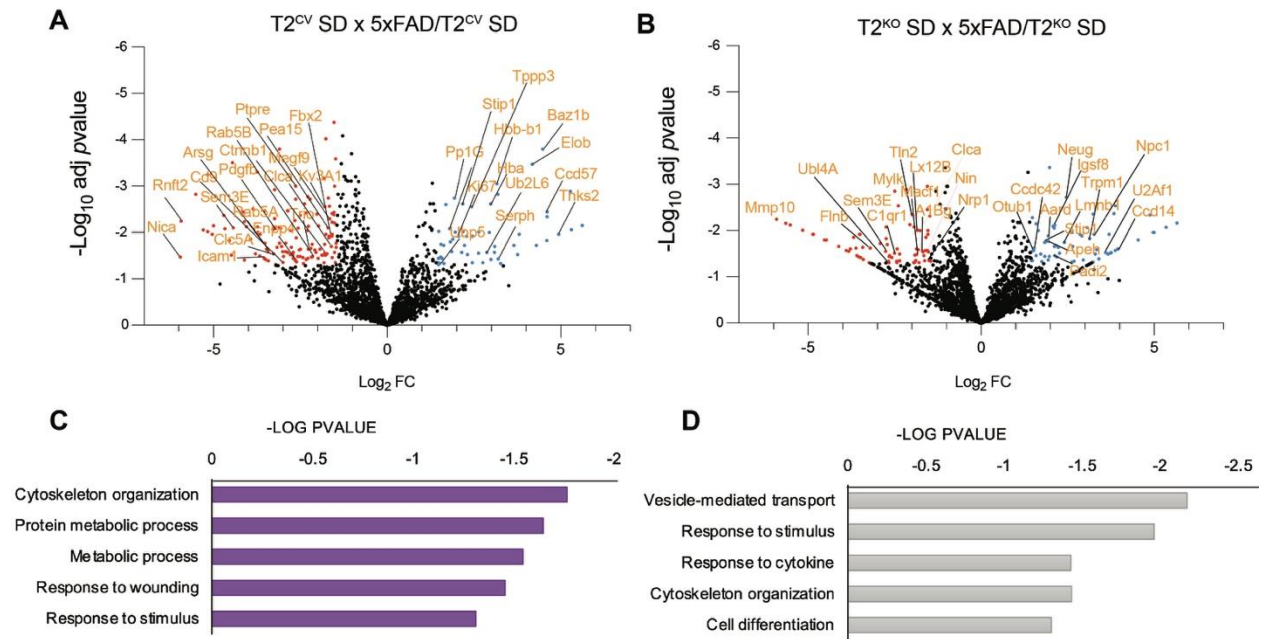

**Supplementary Figure 4. Sleep deprivation induces metabolic dysregulation in cerebrospinal fluid proteome.** (A) Volcano plots of SD T2<sup>CV</sup> versus SD 5xFAD/T2<sup>CV</sup> and (B) SD T2<sup>KO</sup> and SD 5xFAD/T2<sup>KO</sup> mice. (C) Gene ontology functional pathways of SD T2<sup>CV</sup> versus SD 5xFAD/T2<sup>CV</sup> and (B) SD T2<sup>KO</sup> and SD 5xFAD/T2<sup>KO</sup> mice. n=9-11 mice/genotype. Significantly downregulated proteins are noted in blue and upregulated ones in red dots. Ctl – Control, SD – Sleep deprived. Significance for volcano plots was marked at p<0.05 with a 1.5-fold change in Log<sub>2</sub>.

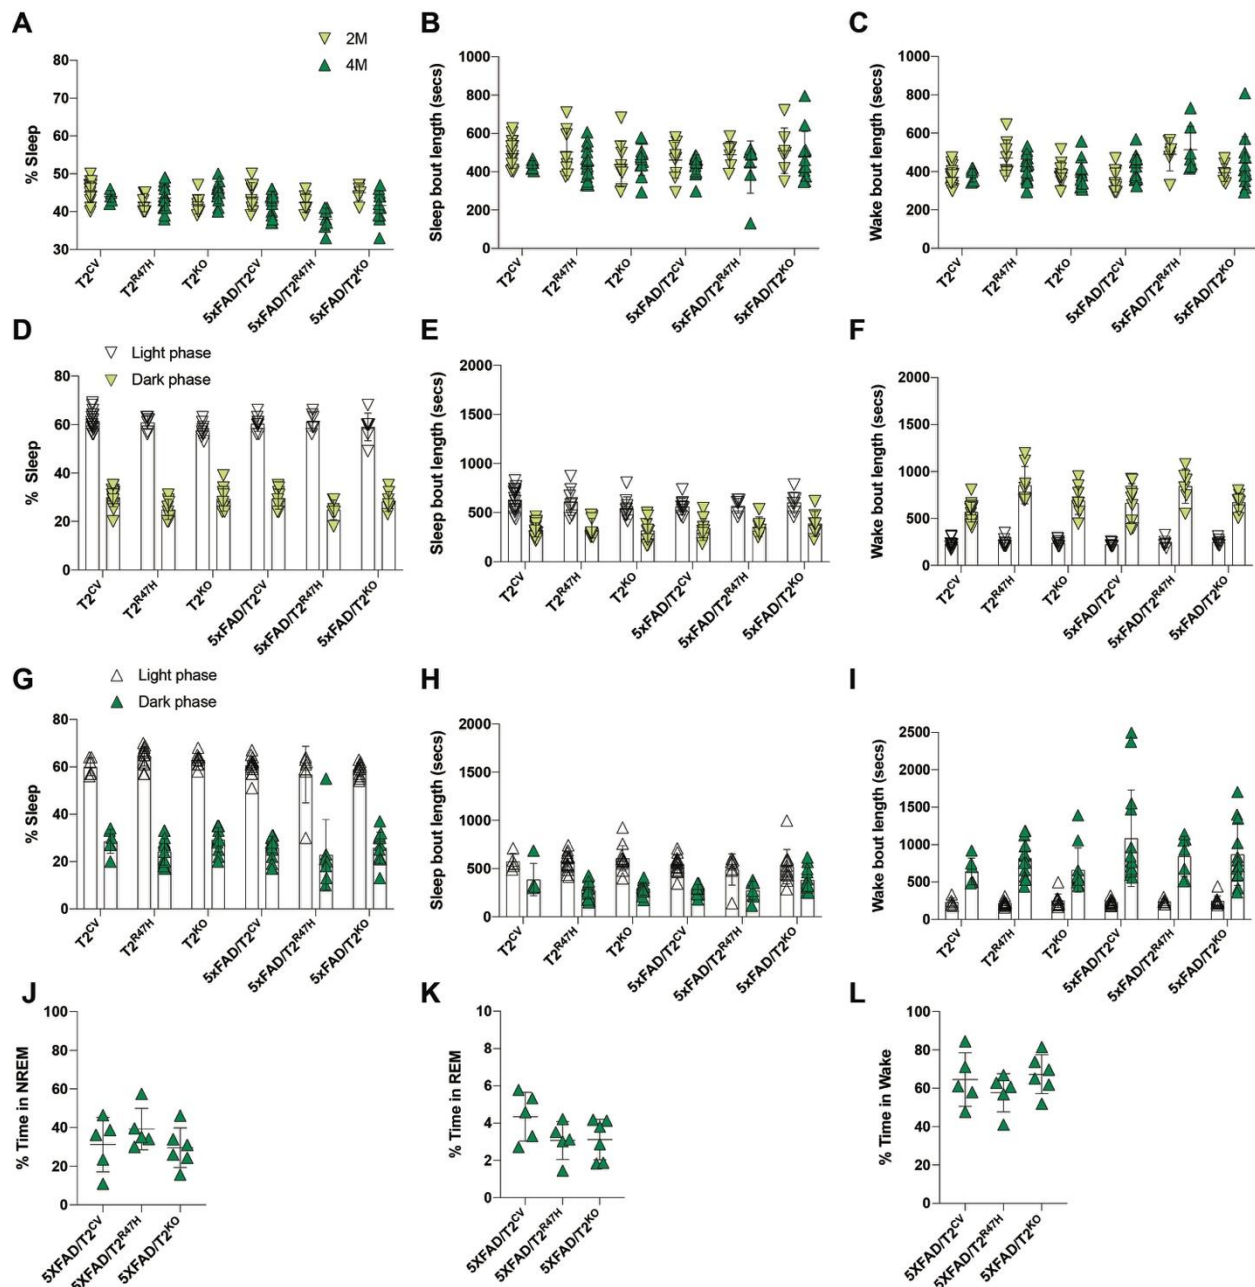

**Supplementary Figure 5. TREM2 genotype does not influence sleep/wake states.** (A) Piezosleep recordings illustrating percentage time spent asleep, (B) sleep bout length, and (C) wake bout length in 2- and 4-months old mice of each genotype. (D) Piezosleep recordings illustrating percentage time spent asleep, (E) sleep bout length, and (F) wake bout length in 2-months old mice separated by light and dark phase. (G) Piezosleep recordings of 4 months old mice demonstrating percentage time spent asleep, (H), sleep bout length, and (I) wake bout length separated by light and dark phase.  $n=7-10$ /genotype. (J) Electroencephalography analyses of percentage time spent in NREM sleep, (K) REM sleep, or (I) awake.  $n=4-6$ /genotype. Ctl – Control, SD – Sleep deprived. Data represent mean  $\pm$  S.E.M. Two-way ANOVA, Tukey’s multiple comparison test; \* $P<0.05$ ; \*\* $P<0.01$ ; \*\*\* $P<0.001$ .

**Data File Supplementary Figure 1.** Primary data from Figures 1-5; Supplementary Figures 1-S3, S5. Excel file provided.
